# Supplementary material
Source: PubMed Central journal article supplement (PMC5527853)

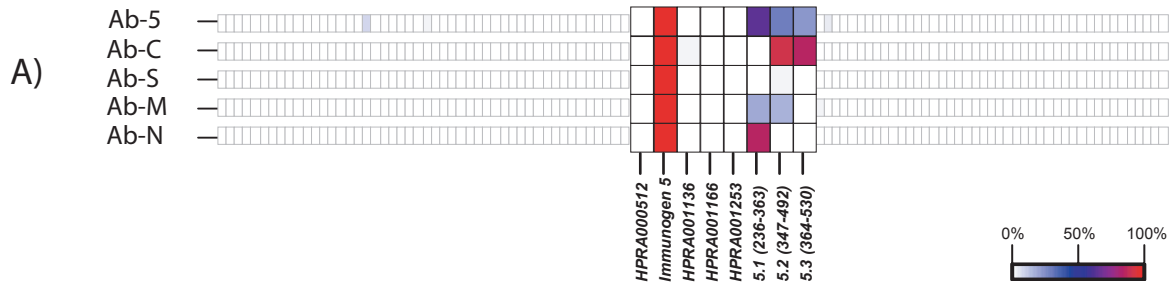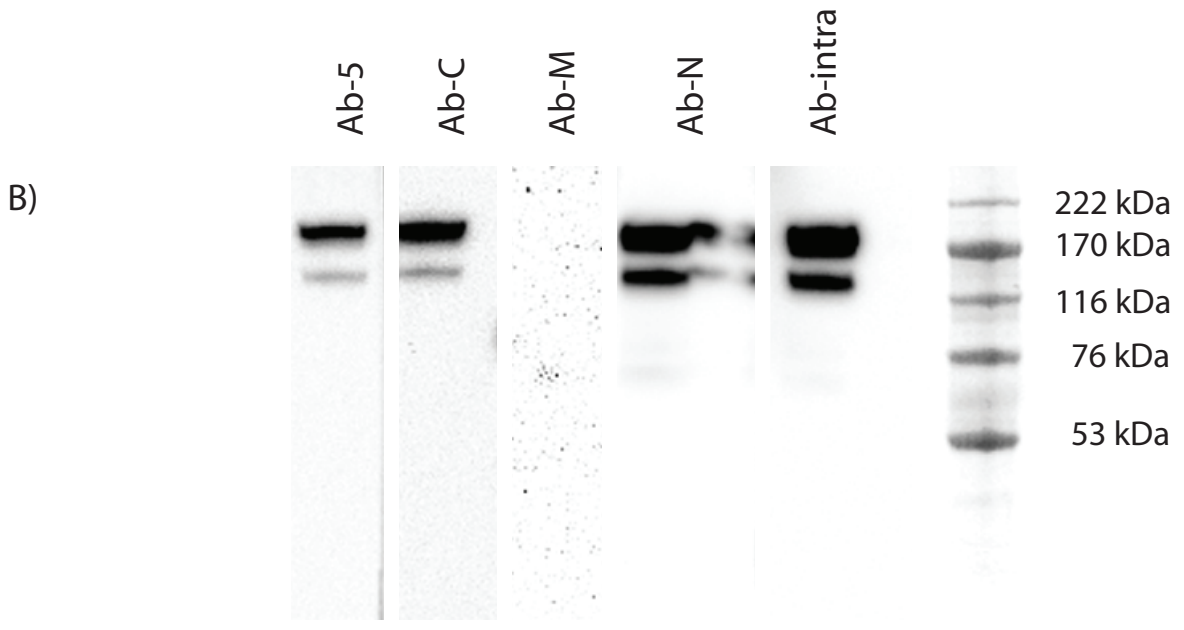

Supplement: MOL2-3-238-s001.pdf [file MOL2-3-238-s001.pdf]

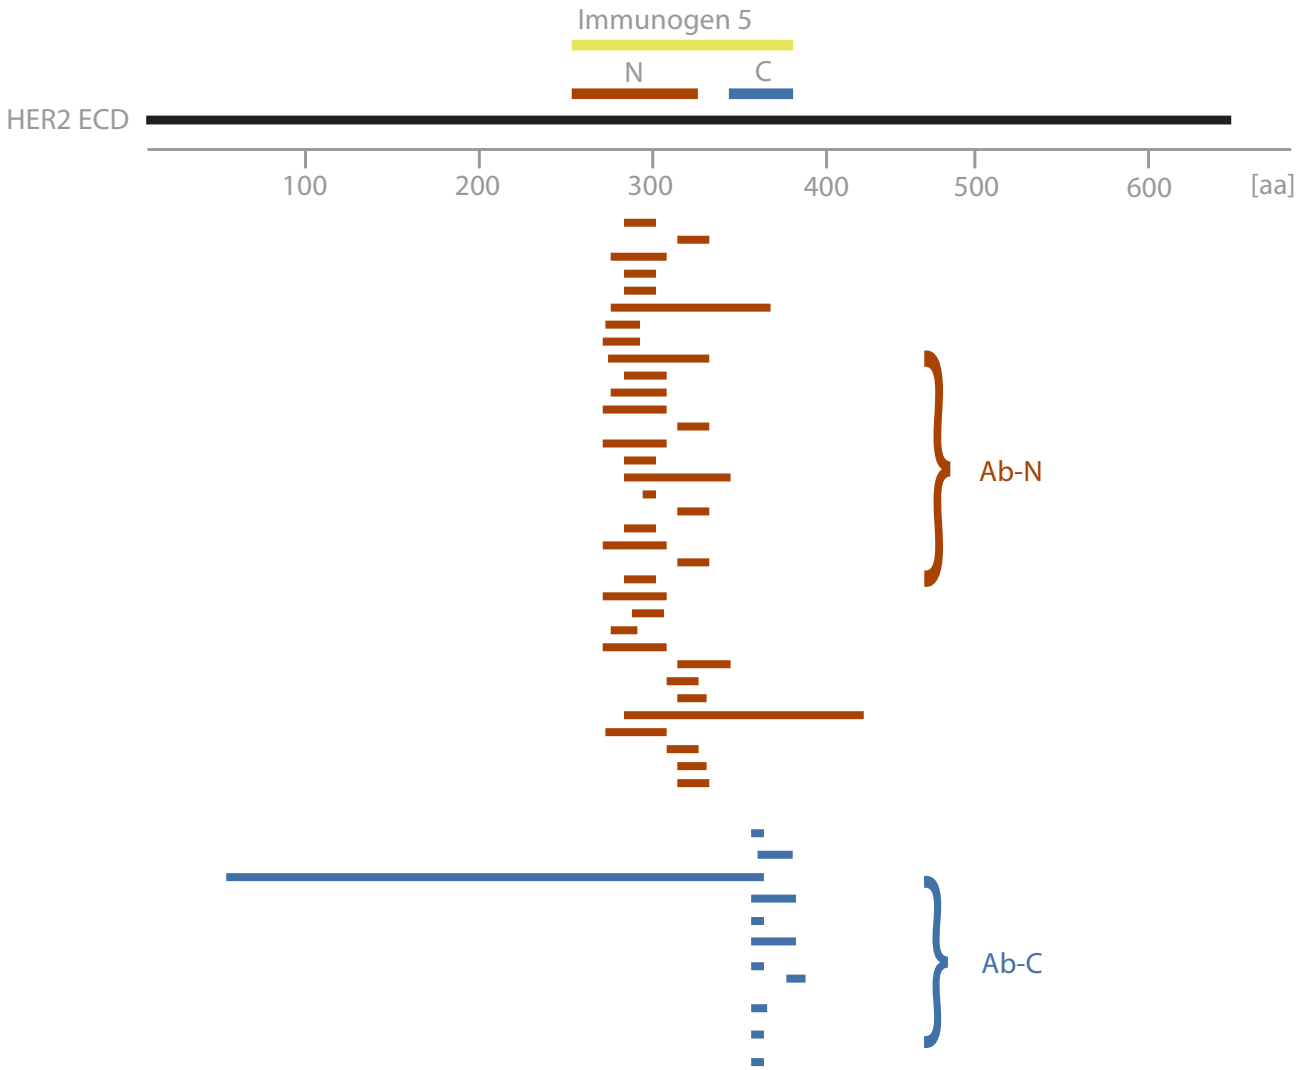

Supplement: MOL2-3-238-s002.pdf [file MOL2-3-238-s002.pdf]
